# Supplementary material
Source: HighWire-hosted journal article supplement (https://bmjopen.bmj.com/content/11/7/e050270)
Supplement: inline-supplementary-material-1 [file inline-supplementary-material-1.pdf]

## Online Supplementary Material

Table S1: Quartiles for reviewer subgroups and their characteristics

| Subgroup, based on shares of predatory reviews per reviewer | Reviews per reviewer |      |      | Publications per reviewer |      |       | Reviews written per year per reviewer |       |       | Articles published per year per reviewer |      |      |
|-------------------------------------------------------------|----------------------|------|------|---------------------------|------|-------|---------------------------------------|-------|-------|------------------------------------------|------|------|
|                                                             | Q1                   | Q2   | Q3   | Q1                        | Q2   | Q3    | Q1                                    | Q2    | Q3    | Q1                                       | Q2   | Q3   |
| <b>No predatory reviews (0%)</b>                            | 10                   | 24   | 54   | 16                        | 35   | 71    | 0.78                                  | 1.91  | 4.15  | 1.57                                     | 2.5  | 4    |
| <b>Few predatory reviews (1-25%)</b>                        | 40                   | 81.5 | 156  | 28                        | 55   | 101   | 2.73                                  | 5.4   | 10.85 | 2.18                                     | 3.29 | 5.43 |
| <b>Some predatory reviews (26-75%)</b>                      | 17                   | 42   | 109  | 12                        | 23.5 | 54.75 | 1.79                                  | 4.57  | 9.67  | 1.38                                     | 2.35 | 4.4  |
| <b>Many predatory reviews (76-99%)</b>                      | 38                   | 77   | 197  | 6                         | 12   | 28    | 4.81                                  | 14.75 | 30.2  | 1.67                                     | 1.7  | 3.57 |
| <b>Predatory reviews only (100%)</b>                        | 2.25                 | 12   | 26.5 | 8                         | 15.5 | 22    | 0.41                                  | 1.42  | 3.25  | 1.06                                     | 1.44 | 2.73 |
